# Supplementary material for: Social, demographic, and economic correlates of food and chemical consumption measured by wastewater-based epidemiology
Source: PubMed Central journal article supplement — Proc Natl Acad Sci U S A. 2019 Oct 7;116(43):21864–73. doi: 10.1073/pnas.1910242116 (PMC6815118; doi:10.1073/pnas.1910242116), 2019-10-07
Supplement: pnas.1910242116.sapp.pdf [file pnas.1910242116.sapp.pdf]

# PNAS

[www.pnas.org](http://www.pnas.org)

Supplementary Information for

Social, demographic and economic correlates of chemical and food consumption measured by wastewater-based epidemiology

Phil. M. Choi, Benjamin Tschärke, Saer Samanipour, Wayne D. Hall, Coral E. Gartner, Jochen F. Mueller, Kevin. V. Thomas and Jake W. O'Brien

Phil M. Choi  
Email: [phil.choi28@gmail.com](mailto:phil.choi28@gmail.com)

**This PDF file includes:**

- Supplementary Information Text 1
- Supplementary Information Text 2
- Figs. S1 to S7
- Tables S1 to S5
- References

### **Supplementary Information Text 1**

#### **Amphetamine and methamphetamine use in Australia.**

In Australia, there is limited prescription use of amphetamine and no therapeutic use of methamphetamine. According to the Australian Pharmaceutical Benefits Scheme, 12,754 boxes of 100x5mg amphetamine tablets were dispensed in August 2016 (time of sampling) (1). This equates to per capita consumption of 0.009mg/day/1000 people, and per capita excretion would be even lower than this value. Our average amphetamine values were 0.301 mg/day/1000 people (range: 115-558), and therefore we consider that the majority of amphetamine detected comes from illicit use. Furthermore, discussions in the Australian National Wastewater Drug Monitoring Report suggests that the majority of amphetamine loads in wastewater derives from methamphetamine metabolism rather than amphetamine consumption (2).

## Supplementary Information Text 2

**Tobacco biomarker outlier.** A closer look at the dataset showed the unusually high tobacco marker loads from on particular catchment, catchment 10, masked a strong trend in the remainder of the dataset. Catchment 10 is located in the capital city of the Northern Territory (NT), the state/territory with the highest prevalence of smoking in Australia (3). Previous WBE reports have found tobacco biomarker loads from the NT to be around twofold greater than the national average throughout 2016 (4). Therefore, we consider that the tobacco biomarker loads from catchment 10 to be valid but atypical (i.e. a potential outlier) in the context of accepted trends with IRSAD. Indeed, exclusion of catchment 10 produced significant negative correlations between IRSAD and nicotine (RP = -0.504) (*SI Appendix* Figure S5). Our results highlight catchment 10 as having far higher nicotine consumption than the other catchments studied.

**Table S1. Chemicals featured in the present study.**

| Name                      | Category          | Biomarker for       | CAS          | Manufacturer               | Method |
|---------------------------|-------------------|---------------------|--------------|----------------------------|--------|
| Hydroxycotinine           | Licit drug        | Tobacco             | 34834-67-8   | Cerilliant                 | B      |
| Cotinine                  | Licit drug        | Tobacco             | 486-56-6     | Cerilliant                 | B      |
| Nicotine                  | Licit drug        | Tobacco             | 54-11-5      | Cerilliant                 | A      |
| Paraxanthine              | Licit drug        | Caffeine            | 611-59-6     | Cerilliant                 | B      |
| Caffeine                  | Licit drug        | Caffeine            | 58-08-2      | Cerilliant                 | B      |
| Ethyl sulfate             | Licit drug        | Ethanol (alcohol)   | 540-82-9     | Lipomed                    | A      |
| Amphetamine               | Illicit drug      | Meth/amphetamine    | 300-62-9     | Cerilliant                 | A      |
| Methamphetamine           | Illicit drug      | Meth/amphetamine    | 7632-10-2    | Cerilliant                 | A      |
| Methadone                 | Opioid            | Methadone           | 76-99-3      | Cerilliant                 | A      |
| EDDP                      | Opioid            | Methadone           | 76-99-3      | Cerilliant                 | A      |
| Codeine                   | Opioid            | Codeine             | 76-57-3      | Cerilliant                 | A      |
| Morphine                  | Opioid            | Morphine            | 57-27-2      | Cerilliant                 | A      |
| Oxycodone                 | Opioid            | Oxycodone           | 76-42-6      | Cerilliant                 | A      |
| Noroxycodone              | Opioid            | Oxycodone           | 52446-25-0   | Cerilliant                 | B      |
| Tramadol                  | Opioid            | Tramadol            | 36282-47-0   | Cerilliant                 | B      |
| Desvenlafaxine            | Antidepressant    | Venlafaxine         | 93413-62-8   | Cerilliant                 | B      |
| Venlafaxine               | Antidepressant    | Venlafaxine         | 99300-78-4   | Cerilliant                 | B      |
| Citalopram                | Antidepressant    | Citalopram          | 59729-32-7   | Cerilliant                 | B      |
| Mirtazapine               | Antidepressant    | Mirtazapine         | 85650-52-8   | Cerilliant                 | B      |
| Amitriptyline             | Antidepressant    | Amitriptyline       | 549-18-8     | Cerilliant                 | B      |
| Carbamazepine             | Anticonvulsant    | Carbamazepine       | 298-46-4     | Cerilliant                 | A      |
| Gabapentin                | Anticonvulsant    | Gabapentin          | 60142-96-3   | Cerilliant                 | B      |
| Pregabalin                | Anticonvulsant    | Pregabalin          | 148553-50-8  | Sigma Aldrich              | B      |
| Ibuprofen                 | Antiinflammatory  | Ibuprofen           | 15687-27-1   | Cerilliant                 | A      |
| Naproxen                  | Antiinflammatory  | Naproxen            | 22204-53-1   | Cerilliant                 | B      |
| Fexofenadine              | Antihistamine     | Fexofenadine        | 153439-40-8  | Cayman Chemical            | B      |
| Cetirizine                | Antihistamine     | Cetirizine          | 83881-52-1   | Cerilliant                 | B      |
| Atenolol                  | Beta blocker      | Atenolol            | 29122-68-7   | Cerilliant                 | A      |
| Hydrochlorothiazide       | Antidiuretic      | Hydrochlorothiazide | 58-93-5      | Cerilliant                 | A      |
| Cephalexin                | Antibiotic        | Cephalexin          | 15686-71-2   | Sigma Aldrich              | B      |
| Sulfamethoxazole          | Antibiotic        | Sulfamethoxazole    | 723-46-6     | Toronto Research Chemicals | B      |
| Trimethoprim              | Antibiotic        | Trimethoprim        | 738-70-5     | Dr Ehrenstorfer            | B      |
| Fluconazole               | Antifungal        | Fluconazole         | 86386-73-4   | TRC                        | B      |
| Acesulfame                | Sweetener         | Acesulfame          | 55589-62-3   | Dr Ehrenstorfer            | B      |
| Saccharin                 | Sweetener         | Saccharin           | 81-07-2      | Sigma Aldrich              | B      |
| Sucralose                 | Sweetener         | Sucralose           | 56038-13-2   | Sigma Aldrich              | B      |
| 2PY                       | Vitamin           | Vitamin B6          | 701-44-0     | Cayman Chemical            | B      |
| 4PY                       | Vitamin           | Vitamin B6          | 769-49-3     | Toronto Research Chemicals | B      |
| αCEHC                     | Vitamin           | Vitamin E           | 4071-32-6    | Cayman Chemical            | B      |
| 4-Pyridoxic acid          | Vitamin           | Vitamin B3          | 82-82-6      | Sigma Aldrich              | B      |
| Proline betaine           | Food              | Citrus              | 471-87-4     | Cayman Chemical            | B      |
| Enterodiol                | Food              | Fiber               | 80226-002    | Sigma Aldrich              | B      |
| Enterolactone             | Food              | Fiber               | 78473-71-9   | Sigma Aldrich              | B      |
| Hydroxycotinine D3        | Internal standard | -                   | 159956-78-2  | Cerilliant                 | B      |
| Cotinine D3               | Internal standard | -                   | 110952-70-0  | Cerilliant                 | B      |
| Codeine D3                | Internal standard | -                   | 70420-71-2   | Cerilliant                 | A/B    |
| Norfentanyl D5            | Internal standard | -                   | 1435933-84-8 | Cerilliant                 | B      |
| Caffeine 13C3             | Internal standard | -                   | 78072-66-9   | Cerilliant                 | B      |
| Venlafaxine D6            | Internal standard | -                   | 1062606-12-5 | Cerilliant                 | B      |
| Citalopram D6             | Internal standard | -                   | 1190003-26-9 | Cerilliant                 | B      |
| Carbamazepine D10         | Internal standard | -                   | 132183-78-9  | Cerilliant                 | B      |
| Gabapentin D10            | Internal standard | -                   | 1024922-02-8 | Cerilliant                 | B      |
| Pregabalin D4             | Internal standard | -                   | 1276197-54-6 | Toronto Research Chemicals | B      |
| Ibuprofen D3              | Internal standard | -                   | 121662-14-4  | Cerilliant                 | B      |
| Fexofenadine D6           | Internal standard | -                   | 548783-71-7  | Cayman Chemical            | B      |
| Cetirizine D4             | Internal standard | -                   | 1219803-84-5 | CDN Isotopes               | B      |
| Atenolol D7               | Internal standard | -                   | 1202864-50-3 | Toronto Research Chemicals | B      |
| Sulfamethoxazole D4       | Internal standard | -                   | 1020719-86-1 | Toronto Research Chemicals | B      |
| Acesulfame D4             | Internal standard | -                   | 55589-62-3   | Toronto Research Chemicals | B      |
| Saccharin D4              | Internal standard | -                   | 1189466-17-8 | Toronto Research Chemicals | B      |
| Sucralose D6              | Internal standard | -                   | 1459161-55-7 | Toronto Research Chemicals | B      |
| Nicotine D4               | Internal standard | -                   | 350818-69-8  | Cerilliant                 | A      |
| Amphetamine D6            | Internal standard | -                   | 73758-26-6   | Cerilliant                 | A      |
| Methamphetamine D9        | Internal standard | -                   | 169565-19-9  | Cerilliant                 | A      |
| Methadone D3              | Internal standard | -                   | 60263-63-0   | Cerilliant                 | A      |
| Morphine D3               | Internal standard | -                   | 67293-88-3   | Cerilliant                 | A      |
| Hydrochlorothiazide 13CD2 | Internal standard | -                   | 1190006-03-1 | Toronto Research Chemicals | A      |

Method B was performed on an AB Sciex 6500+. Method A was performed on an AB Sciex 5500+. Details are available in the materials and methods section.

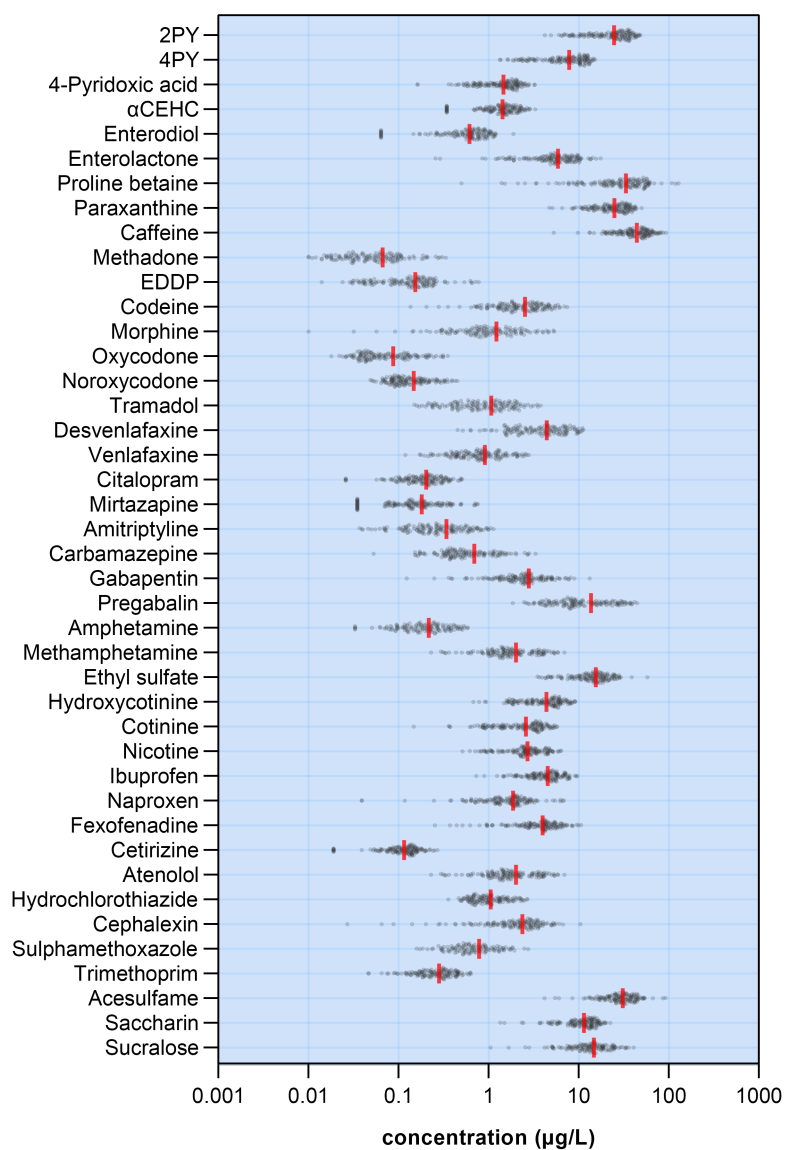

**Fig. S1.** Concentrations of biomarkers in wastewater analyzed in the present study. Mean concentration for each biomarker is indicated by a red line. 2PY: N-methyl-2-pyridone-5-carboxamide, 4PY: N-methyl-4-pyridone-3-carboxamide, αCEHC: α-carboxyethyl hydrochroman, EDDP: 2-ethylidene-1,5-dimethyl-3,3-diphenylpyrrolidine.

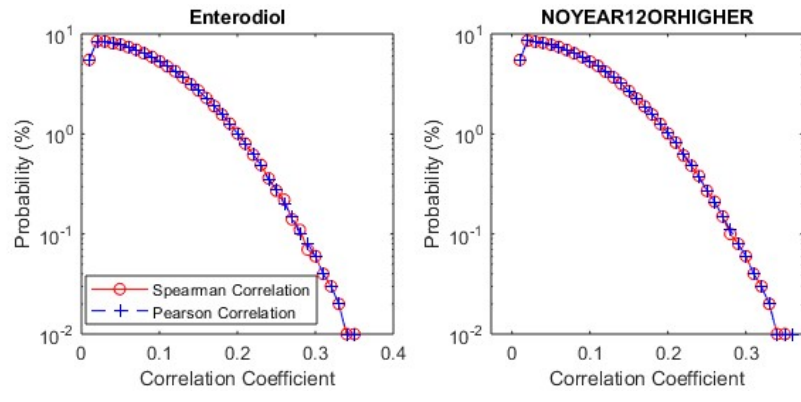

**Fig. S2.** Probability of false positive detection as determined using the confusion matrix (i.e. bootstrapping) method.









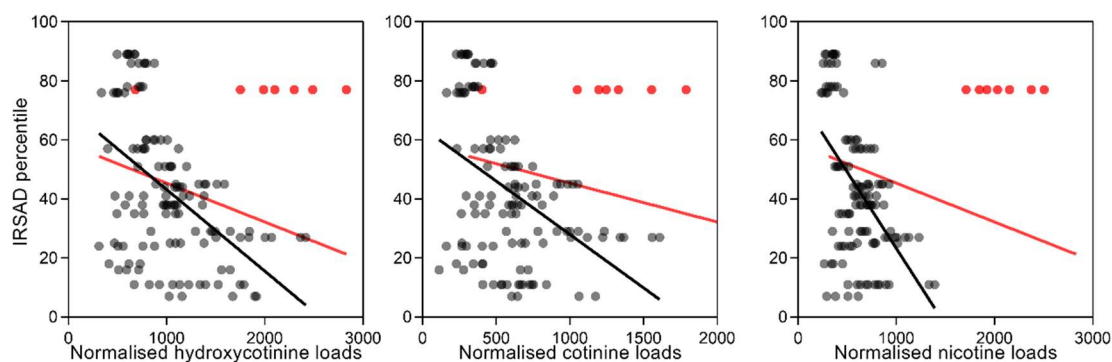

**Fig. S5.** Tobacco biomarker associations with index of relative socioeconomic advantage and disadvantage (IRSAD) before (red) and after (black) catchment 10 is removed from the dataset. Measurements from catchment 10 and regressions from including catchment 10 are highlighted in red. Excluding catchment 10 from the dataset resulted in R-value changes from -0.261 to -0.488 for hydroxycotinine, -0.233 to -0.435 for cotinine and -0.032 to -0.504 for nicotine. Loads are mg/24h/1,000 capita.

|                   | AT SCHOOL | CERTIFICATE | DIPLOMA | NDGDU  | NOYARIZONKHIGHER | DSEIBUTYO | ENGLISHROOM | HIGHWAY | GROUP  | LOVE   | HIGHCAR | NCAR   | HIGHMOTAGE | LOWMINT | INC LOW | INC HIGH | MONET  | DCC DRIVERS | DCC LABOUR | DCC MANAGER | DCC SKILLS | DCC Skill 4 | DCC Skill 2 | DCC Skill 1 | OEAPPARENT | OMNINE | MORTGAGE | SEPPORCED | UNEMPLOYED | UNWONCOED |        |        |        |        |        |        |        |       |       |       |       |        |       |
|-------------------|-----------|-------------|---------|--------|------------------|-----------|-------------|---------|--------|--------|---------|--------|------------|---------|---------|----------|--------|-------------|------------|-------------|------------|-------------|-------------|-------------|------------|--------|----------|-----------|------------|-----------|--------|--------|--------|--------|--------|--------|--------|-------|-------|-------|-------|--------|-------|
| 2PY               | 0.090     | 0.174       | -0.454  | 0.488  | 0.305            | 0.287     | -0.444      | -0.362  | 0.533  | 0.311  | 0.298   | -0.068 | 0.305      | -0.289  | 0.405   | 0.044    | 0.619  | 0.620       | -0.139     | -0.477      | 0.608      | -0.404      | -0.337      | -0.395      | 0.540      | 0.439  | -0.378   | -0.407    | -0.016     | 0.524     | -0.481 | -0.112 | 0.164  | -0.426 | -0.505 | -0.454 | 0.066  |       |       |       |       |        |       |
| 4PY               | 0.121     | 0.382       | -0.486  | 0.452  | 0.339            | 0.326     | -0.422      | -0.308  | 0.492  | 0.428  | 0.212   | -0.027 | 0.258      | -0.357  | 0.009   | 0.009    | 0.528  | 0.396       | -0.371     | -0.243      | 0.502      | 0.389       | -0.296      | -0.364      | -0.006     | 0.477  | -0.388   | -0.193    | 0.114      | -0.435    | -0.476 | -0.409 | 0.012  | 0.148  | -0.364 | -0.528 | -0.483 | 0.089 |       |       |       |        |       |
| 4-Phyridoxic acid | 0.203     | 0.202       | -0.384  | 0.421  | 0.312            | 0.224     | -0.415      | -0.347  | -0.471 | 0.361  | 0.194   | -0.019 | 0.139      | -0.281  | 0.344   | 0.044    | 0.505  | 0.534       | -0.467     | -0.469      | 0.524      | 0.349       | -0.294      | -0.379      | 0.079      | 0.444  | -0.409   | -0.129    | 0.149      | -0.364    | -0.528 | -0.483 | 0.089  | 0.144  | -0.105 | -0.211 | -0.209 | 0.144 |       |       |       |        |       |
| αCFC              | 0.013     | 0.156       | -0.246  | 0.221  | 0.313            | 0.298     | -0.256      | -0.078  | -0.182 | 0.381  | 0.147   | -0.144 | 0.180      | -0.035  | 0.132   | 0.179    | 0.187  | 0.262       | 0.002      | -0.173      | 0.518      | -0.150      | -0.386      | 0.002       | 0.319      | 0.151  | 0.042    | -0.327    | 0.223      | 0.195     | -0.003 | -0.202 | -0.046 | -0.105 | -0.211 | -0.209 | 0.144  |       |       |       |       |        |       |
| Enterodiol        | -0.039    | 0.193       | -0.434  | 0.645  | 0.564            | -0.024    | -0.639      | -0.576  | 0.525  | 0.297  | 0.520   | -0.042 | 0.316      | -0.139  | 0.072   | 0.222    | 0.550  | 0.740       | -0.483     | -0.580      | 0.661      | -0.540      | -0.456      | -0.587      | 0.754      | 0.653  | -0.520   | -0.585    | 0.233      | 0.640     | -0.540 | -0.107 | 0.008  | -0.371 | -0.616 | -0.330 | 0.411  |       |       |       |       |        |       |
| Enterolactone     | 0.115     | 0.341       | -0.561  | 0.666  | 0.553            | 0.185     | -0.645      | -0.524  | -0.537 | 0.447  | 0.374   | -0.002 | 0.304      | -0.274  | 0.249   | 0.122    | 0.576  | 0.629       | -0.485     | -0.586      | 0.609      | -0.576      | -0.459      | -0.524      | 0.701      | 0.613  | -0.505   | -0.563    | 0.152      | 0.683     | -0.527 | -0.113 | 0.115  | -0.443 | -0.603 | -0.504 | 0.297  |       |       |       |       |        |       |
| Proline betaine   | 0.190     | 0.486       | -0.552  | 0.528  | 0.392            | 0.392     | -0.494      | -0.300  | -0.529 | 0.475  | 0.291   | -0.134 | 0.006      | -0.048  | 0.282   | -0.074   | 0.262  | 0.416       | 0.040      | 0.655       | -0.496     | 0.459       | -0.289      | -0.121      | 0.039      | 0.242  | -0.203   | 0.248     | -0.176     | -0.009    | 0.150  | -0.049 | 0.041  | -0.262 | 0.359  | -0.075 | 0.135  | 0.226 | 0.381 | 0.510 | 0.048 | -0.095 | 0.547 |
| Paraxanthine      | 0.064     | 0.278       | -0.473  | 0.449  | 0.269            | 0.311     | -0.371      | -0.293  | 0.462  | 0.458  | 0.316   | -0.175 | 0.307      | -0.187  | 0.251   | 0.114    | 0.451  | 0.607       | -0.532     | -0.399      | 0.536      | -0.286      | -0.341      | -0.178      | 0.504      | 0.350  | -0.165   | -0.379    | -0.013     | 0.442     | -0.389 | -0.164 | -0.003 | 0.362  | -0.447 | -0.409 | 0.034  | 0.034 |       |       |       |        |       |
| Caffeine          | -0.010    | 0.347       | -0.569  | 0.603  | 0.410            | 0.247     | -0.507      | -0.441  | -0.509 | 0.449  | 0.454   | -0.220 | 0.379      | -0.138  | 0.208   | 0.200    | 0.526  | 0.727       | -0.197     | -0.487      | 0.682      | -0.383      | -0.491      | -0.337      | 0.670      | 0.506  | -0.318   | -0.549    | 0.074      | 0.599     | -0.496 | -0.103 | 0.032  | -0.344 | -0.578 | -0.557 | 0.204  |       |       |       |       |        |       |
| Methadone         | -0.328    | -0.059      | -0.367  | 0.191  | 0.100            | 0.237     | -0.333      | -0.020  | 0.080  | 0.488  | 0.344   | -0.451 | 0.284      | -0.438  | -0.250  | 0.348    | -0.091 | 0.037       | 0.319      | 0.220       | -0.135     | -0.183      | -0.326      | 0.392       | 0.180      | 0.100  | 0.437    | -0.301    | -0.020     | 0.100     | 0.123  | 0.104  | -0.249 | 0.283  | 0.065  | -0.056 | 0.361  | 0.361 |       |       |       |        |       |
| EDDP              | -0.147    | 0.146       | -0.470  | 0.211  | 0.051            | 0.276     | -0.028      | 0.011   | 0.032  | 0.487  | 0.314   | -0.371 | 0.298      | -0.138  | 0.465   | -0.009   | 0.100  | 0.312       | 0.168      | -0.077      | 0.125      | -0.315      | 0.418       | 0.156       | 0.144      | 0.452  | -0.233   | -0.153    | 0.154      | 0.088     | 0.069  | -0.189 | 0.152  | 0.068  | -0.034 | 0.200  | 0.200  |       |       |       |       |        |       |
| Codine            | -0.080    | -0.396      | 0.362   | -0.426 | -0.088           | -0.014    | 0.323       | 0.371   | 0.361  | -0.147 | -0.193  | -0.160 | -0.194     | 0.211   | -0.248  | 0.073    | -0.434 | -0.255      | 0.52       | 0.311       | -0.386     | 0.355       | -0.007      | 0.478       | -0.265     | -0.470 | 0.471    | 0.157     | 0.279      | -0.469    | 0.495  | 0.126  | 0.243  | 0.321  | 0.239  | 0.112  | -0.084 | 0.084 |       |       |       |        |       |
| Morphine          | -0.629    | 0.230       | 0.108   | 0.021  | 0.185            | -0.134    | 0.006       | -0.048  | 0.282  | -0.074 | 0.262   | 0.416  | 0.040      | 0.655   | -0.496  | 0.459    | -0.289 | -0.121      | 0.039      | 0.242       | -0.203     | 0.248       | -0.176      | -0.009      | 0.150      | -0.049 | 0.041    | -0.262    | 0.359      | -0.075    | 0.135  | 0.226  | 0.381  | 0.510  | 0.048  | -0.095 | 0.547  |       |       |       |       |        |       |
| Oxycodone         | -0.120    | -0.321      | 0.200   | -0.312 | 0.110            | -0.099    | 0.250       | 0.356   | 0.581  | -0.323 | -0.116  | -0.161 | -0.184     | 0.197   | -0.211  | 0.118    | -0.329 | -0.245      | 0.006      | 0.358       | -0.438     | 0.263       | -0.193      | 0.152       | -0.125     | -0.250 | 0.172    | 0.047     | 0.333      | -0.273    | 0.458  | 0.156  | 0.302  | 0.471  | 0.290  | 0.037  | 0.110  | 0.110 |       |       |       |        |       |
| Neroxycodone      | -0.044    | -0.177      | 0.110   | -0.279 | 0.049            | 0.133     | 0.237       | 0.382   | 0.434  | -0.121 | -0.096  | -0.162 | -0.137     | 0.120   | -0.041  | 0.142    | -0.233 | -0.171      | 0.158      | 0.235       | -0.361     | 0.357       | 0.144       | 0.221       | -0.107     | -0.257 | 0.253    | 0.066     | 0.178      | -0.255    | 0.432  | 0.042  | 0.230  | 0.338  | 0.250  | 0.064  | 0.010  |       |       |       |       |        |       |
| Tramadol          | -0.048    | -0.310      | 0.128   | -0.353 | -0.267           | -0.025    | 0.430       | 0.363   | 0.414  | -0.057 | -0.133  | -0.244 | -0.169     | 0.180   | -0.120  | 0.093    | -0.341 | -0.216      | 0.358      | 0.376       | -0.385     | 0.486       | 0.076       | 0.082       | -0.279     | -0.372 | 0.470    | 0.256     | -0.136     | -0.359    | 0.322  | 0.136  | -0.227 | 0.332  | 0.310  | 0.128  | -0.199 |       |       |       |       |        |       |
| Gabapentin        | -0.394    | -0.095      | -0.080  | 0.113  | 0.323            | 0.110     | -0.103      | -0.057  | 0.102  | 0.054  | 0.241   | -0.414 | 0.089      | 0.419   | -0.151  | 0.383    | 0.051  | 0.094       | 0.098      | 0.107       | -0.019     | -0.106      | -0.392      | 0.002       | 0.342      | 0.046  | 0.041    | -0.411    | 0.378      | 0.074     | 0.070  | 0.155  | 0.204  | 0.388  | -0.118 | -0.320 | 0.487  |       |       |       |       |        |       |
| Pregabalin        | -0.581    | 0.299       | 0.202   | -0.292 | -0.064           | 0.015     | 0.339       | 0.334   | 0.563  | -0.130 | 0.080   | -0.478 | -0.017     | 0.703   | -0.474  | 0.454    | -0.482 | -0.367      | 0.438      | 0.582       | -0.530     | 0.549       | 0.062       | 0.422       | -0.156     | -0.335 | 0.474    | -0.024    | 0.213      | -0.378    | 0.497  | 0.226  | 0.453  | 0.713  | 0.408  | 0.159  | 0.344  |       |       |       |       |        |       |
| Amphetamine       | 0.164     | -0.188      | 0.259   | -0.383 | -0.291           | 0.114     | 0.297       | 0.431   | 0.137  | 0.028  | -0.246  | 0.181  | -0.188     | -0.084  | -0.099  | -0.082   | -0.417 | -0.293      | 0.237      | 0.440       | 0.428      | -0.397      | 0.466       | 0.433       | 0.494      | -0.273 | -0.451   | 0.415     | -0.403     | 0.201     | -0.102 | 0.318  | 0.521  | -0.363 | 0.363  |        |        |       |       |       |       |        |       |
| Methamphetamine   | -0.098    | -0.165      | 0.101   | -0.349 | -0.575           | 0.195     | 0.479       | 0.463   | 0.201  | 0.227  | -0.011  | -0.167 | -0.057     | 0.206   | -0.250  | 0.180    | -0.484 | -0.181      | 0.607      | 0.329       | -0.275     | 0.517       | 0.557       | 0.617       | -0.444     | -0.482 | 0.625    | 0.541     | -0.562     | -0.465    | 0.313  | -0.174 | -0.325 | 0.069  | 0.443  | 0.542  | -0.421 |       |       |       |       |        |       |
| Ethyl sulfate     | -0.174    | 0.218       | -0.334  | 0.485  | 0.291            | -0.006    | 0.441       | -0.376  | 0.392  | 0.155  | 0.517   | -0.242 | 0.404      | 0.004   | -0.047  | 0.258    | 0.348  | 0.716       | -0.160     | -0.410      | 0.601      | -0.270      | -0.385      | -0.386      | 0.537      | 0.358  | -0.333   | -0.470    | 0.169      | 0.463     | -0.385 | -0.142 | 0.197  | -0.243 | -0.472 | -0.463 | 0.173  |       |       |       |       |        |       |
| Hydroxycotinine   | -0.463    | -0.212      | 0.199   | -0.149 | -0.182           | 0.030     | 0.193       | 0.198   | 0.130  | 0.036  | 0.206   | -0.421 | 0.129      | 0.460   | -0.351  | 0.325    | -0.324 | 0.089       | 0.451      | -0.029      | 0.408      | 0.318       | -0.058      | -0.309      | 0.344      | 0.032  | 0.056    | -0.286    | 0.216      | -0.179    | 0.472  | 0.233  | 0.145  | 0.121  | -0.005 | 0.005  |        |       |       |       |       |        |       |
| Cotinine          | -0.484    | -0.322      | 0.280   | -0.168 | -0.195           | -0.114    | 0.203       | 0.158   | 0.147  | -0.046 | 0.199   | -0.378 | 0.173      | 0.498   | -0.388  | 0.300    | -0.388 | 0.052       | 0.395      | 0.177       | -0.032     | 0.416       | 0.198       | -0.083      | -0.328     | 0.308  | 0.069    | 0.051     | -0.331     | 0.197     | -0.151 | -0.470 | 0.280  | 0.140  | 0.140  | 0.016  |        |       |       |       |       |        |       |
| Nicotine          | -0.409    | 0.046       | 0.200   | 0.095  | -0.056           | 0.069     | -0.035      | 0.000   | 0.065  | 0.134  | 0.360   | -0.418 | 0.295      | 0.269   | -0.296  | 0.282    | -0.202 | 0.430       | 0.181      | -0.092      | 0.273      | 0.168       | 0.001       | 0.006       | 0.124      | 0.020  | -0.111   | 0.139     | -0.256     | -0.044    | -0.285 | -0.482 | -0.016 | -0.096 | -0.073 | -0.082 |        |       |       |       |       |        |       |
| Ibuprofen         | 0.033     | -0.047      | -0.113  | 0.281  | 0.419            | -0.051    | -0.382      | -0.261  | -0.331 | 0.132  | 0.252   | -0.033 | 0.143      | -0.061  | 0.083   | 0.164    | 0.305  | 0.450       | -0.187     | -0.385      | 0.372      | -0.274      | -0.388      | -0.097      | 0.467      | 0.178  | -0.079   | -0.396    | 0.310      | 0.236     | -0.107 | -0.294 | -0.037 | -0.190 | -0.418 | -0.345 | 0.252  |       |       |       |       |        |       |
| Naproxen          | -0.619    | -0.231      | 0.105   | 0.111  | 0.279            | -0.190    | -0.124      | -0.148  | 0.109  | -0.099 | 0.336   | -0.396 | 0.146      | 0.613   | -0.410  | 0.460    | -0.128 | 0.070       | 0.061      | 0.094       | -0.022     | 0.151       | -0.263      | -0.029      | 0.287      | 0.007  | 0.029    | -0.389    | 0.416      | 0.007     | 0.084  | 0.076  | 0.375  | 0.403  | -0.084 | -0.178 | 0.601  |       |       |       |       |        |       |
| Fenofibrate       | -0.485    | -0.187      | -0.009  | 0.226  | 0.401            | 0.161     | -0.243      | -0.265  | 0.002  | 0.006  | 0.322   | -0.387 | 0.211      | 0.477   | -0.316  | 0.343    | -0.033 | 0.216       | -0.056     | -0.033      | 0.115      | 0.010       | 0.449       | -0.062      | 0.391      | 0.130  | -0.026   | -0.524    | 0.529      | 0.139     | -0.023 | 0.026  | 0.333  | 0.292  | -0.233 | -0.344 | 0.559  |       |       |       |       |        |       |
| Cétirizine        | -0.448    | -0.118      | -0.193  | 0.444  | 0.392            | -0.154    | -0.398      | -0.495  | -0.275 | 0.155  | 0.440   | -0.292 | 0.275      | 0.395   | -0.183  | 0.352    | 0.167  | 0.346       | -0.139     | -0.237      | 0.321      | -0.151      | -0.348      | 0.002       | 0.512      | 0.319  | -0.194   | -0.540    | 0.247      | 0.347     | -0.312 | 0.042  | 0.184  | 0.071  | -0.410 | -0.380 | 0.939  |       |       |       |       |        |       |
| Atenolol          | -0.434    | -0.326      | 0.102   | -0.369 | -0.257           | 0.033     | 0.557       | 0.341   | 0.621  | -0.118 | -0.06   |        |            |         |         |          |        |             |            |             |            |             |             |             |            |        |          |           |            |           |        |        |        |        |        |        |        |       |       |       |       |        |       |



|                 | ATMUNI | CERTIFICATE | DEGREE | DIPLOMA | MD/PHD | NOYAKTIDZHIGHER | CHILDRENLESS | DISABILITY | ENGLISH/SPOK | REWARD | HIGHBUD | GROUP  | LOVE   | HIGHCAR | MCAR   | HIGHMORTGAGE | LOANMANT | INC. LOW | INC. HIGH | MONET  | DCC LABOUR | DCC MANAGER | DCC SKILLS | DCC SKILL 4 | DCC SKILL 2 | SKILL  | OMNINE | MORTGAGE | SEPVORCED | UNEMPLOYED | UNWONKED |        |        |        |        |        |        |        |
|-----------------|--------|-------------|--------|---------|--------|-----------------|--------------|------------|--------------|--------|---------|--------|--------|---------|--------|--------------|----------|----------|-----------|--------|------------|-------------|------------|-------------|-------------|--------|--------|----------|-----------|------------|----------|--------|--------|--------|--------|--------|--------|--------|
| ZPY             | 0.105  | 0.662       | -0.456 | 0.253   | 0.032  | -0.596          | -0.424       | -0.689     | 0.427        | 0.256  | 0.102   | 0.183  | -0.362 | 0.324   | -0.108 | 0.642        | 0.618    | -0.355   | -0.592    | 0.609  | -0.550     | 0.325       | -0.565     | 0.432       | 0.473       | -0.575 | -0.315 | -0.221   | 0.477     | -0.511     | -0.199   | 0.264  | -0.501 | -0.535 | -0.302 | 0.156  |        |        |
| Enterolectone   | 0.150  | 0.499       | -0.522 | 0.692   | 0.628  | 0.231           | -0.737       | -0.552     | 0.600        | 0.475  | 0.255   | 0.094  | 0.168  | -0.327  | 0.111  | -0.057       | 0.648    | 0.742    | -0.539    | -0.587 | 0.557      | 0.633       | 0.537      | 0.648       | 0.711       | 0.625  | -0.645 | -0.500   | -0.017    | 0.654      | -0.518   | -0.154 | 0.184  | -0.451 | -0.651 | -0.493 | 0.484  |        |
| Proline betaine | 0.170  | 0.695       | 0.068  | 0.533   | 0.323  | 0.488           | -0.578       | -0.311     | -0.593       | 0.627  | 0.177   | 0.062  | 0.220  | -0.349  | 0.289  | 0.041        | 0.538    | -0.336   | -0.448    | 0.450  | 0.470      | -0.270      | -0.269     | 0.491       | -0.429      | -0.257 | 0.191  | -0.467   | -0.490    | -0.250     | 0.157    | 0.196  | -0.647 | -0.430 | -0.554 | 0.148  |        |        |
| Paraxanthine    | 0.071  | 0.512       | -0.24  | 0.401   | 0.276  | 0.360           | -0.436       | -0.285     | -0.507       | 0.566  | 0.235   | -0.180 | 0.130  | -0.387  | 0.353  | 0.353        | 0.416    | -0.329   | -0.368    | -0.250 | -0.276     | 0.355       | -0.342     | -0.159      | 0.106       | -0.336 | -0.410 | -0.253   | 0.148     | 0.653      | -0.272   | -0.535 | -0.419 | 0.342  | 0.053  | 0.622  | -0.535 | -0.419 |
| Caffeine        | -0.011 | 0.605       | -0.085 | 0.558   | 0.401  | 0.405           | -0.544       | -0.415     | -0.513       | 0.638  | 0.344   | -0.162 | 0.320  | -0.128  | 0.129  | 0.131        | 0.453    | 0.603    | -0.249    | -0.415 | 0.393      | -0.400      | 0.534      | -0.462      | 0.568       | 0.503  | -0.481 | -0.445   | -0.227    | 0.524      | -0.625   | -0.094 | 0.653  | -0.272 | -0.535 | -0.419 | 0.342  |        |
| Methadone       | -0.224 | 0.335       | -0.057 | 0.451   | 0.370  | 0.459           | -0.289       | -0.268     | -0.024       | 0.616  | 0.382   | -0.425 | 0.423  | 0.242   | -0.113 | 0.520        | 0.076    | 0.299    | 0.028     | 0.106  | -0.069     | -0.111      | 0.321      | -0.189      | 0.422       | 0.394  | -0.156 | -0.502   | -0.355    | 0.393      | -0.094   | 0.134  | 0.106  | 0.191  | -0.211 | -0.283 | 0.492  |        |
| EDDP            | -0.173 | 0.317       | -0.060 | 0.448   | 0.343  | 0.450           | -0.308       | -0.256     | -0.043       | 0.575  | 0.380   | -0.353 | 0.375  | 0.194   | -0.066 | 0.483        | 0.116    | 0.308    | 0.028     | 0.081  | -0.025     | -0.168      | 0.318      | -0.219      | 0.398       | 0.408  | -0.177 | -0.451   | -0.309    | 0.493      | -0.115   | 0.161  | 0.040  | 0.174  | -0.190 | -0.332 | 0.462  |        |
| Codeine         | -0.240 | -0.192      | -0.033 | -0.283  | -0.303 | 0.229           | 0.408        | 0.377      | 0.508        | 0.003  | 0.096   | -0.367 | 0.204  | 0.355   | -0.265 | 0.410        | -0.504   | -0.411   | 0.483     | 0.543  | -0.508     | 0.469       | 0.071      | 0.448       | -0.346      | -0.263 | 0.421  | 0.181    | -0.100    | -0.291     | 0.429    | 0.109  | -0.273 | 0.457  | 0.395  | 0.251  | -0.212 |        |
| Morphine        | -0.317 | -0.327      | 0.181  | -0.077  | 0.077  | -0.050          | 0.242        | 0.138      | 0.437        | -0.110 | 0.122   | -0.364 | 0.065  | 0.366   | -0.430 | 0.350        | -0.396   | -0.229   | 0.227     | 0.291  | -0.284     | 0.432       | 0.026      | 0.217       | 0.009       | -0.095 | 0.224  | -0.030   | 0.329     | -0.106     | 0.186    | 0.107  | -0.384 | 0.320  | 0.205  | -0.051 | 0.559  |        |
| Oxycodone       | -0.053 | -0.212      | 0.148  | -0.201  | 0.085  | 0.050           | 0.280        | 0.301      | 0.505        | -0.106 | -0.011  | -0.179 | 0.073  | 0.132   | -0.205 | 0.177        | -0.408   | -0.236   | 0.124     | 0.238  | -0.474     | 0.254       | -0.060     | 0.292       | -0.069      | -0.180 | 0.266  | 0.063    | 0.312     | -0.164     | 0.403    | 0.077  | 0.287  | 0.400  | 0.266  | 0.055  | 0.667  |        |
| Noroxycodone    | -0.021 | -0.083      | 0.046  | -0.195  | 0.051  | 0.158           | 0.247        | 0.293      | 0.367        | 0.063  | 0.032   | -0.193 | 0.117  | 0.105   | -0.095 | 0.172        | -0.323   | -0.162   | 0.137     | 0.246  | -0.404     | 0.214       | -0.018     | 0.269       | -0.062      | -0.192 | 0.256  | 0.083    | 0.157     | -0.185     | 0.369    | 0.038  | 0.225  | 0.329  | 0.223  | 0.072  | -0.016 |        |
| Noroxycodone    | -0.021 | -0.083      | 0.046  | -0.195  | 0.051  | 0.158           | 0.247        | 0.293      | 0.367        | 0.063  | 0.032   | -0.193 | 0.117  | 0.105   | -0.095 | 0.172        | -0.323   | -0.162   | 0.137     | 0.246  | -0.404     | 0.214       | -0.018     | 0.269       | -0.062      | -0.192 | 0.256  | 0.083    | 0.157     | -0.185     | 0.369    | 0.038  | 0.225  | 0.329  | 0.223  | 0.072  | -0.016 |        |
| Tramadol        | -0.031 | -0.459      | 0.143  | -0.804  | -0.665 | 0.076           | 0.825        | 0.773      | 0.625        | 0.331  | -0.328  | -0.144 | -0.141 | 0.252   | -0.196 | 0.070        | 0.759    | -0.768   | 0.513     | 0.655  | -0.687     | 0.722       | 0.637      | 0.840       | -0.764      | -0.804 | 0.806  | 0.725    | -0.155    | 0.818      | 0.656    | 0.022  | 0.250  | 0.358  | 0.688  | 0.360  | 0.693  |        |
| Desvenlafaxine  | 0.004  | -0.504      | 0.474  | -0.545  | -0.400 | -0.103          | 0.578        | 0.531      | 0.532        | 0.337  | -0.285  | -0.089 | -0.058 | 0.170   | -0.211 | 0.112        | -0.553   | -0.586   | 0.397     | 0.498  | -0.569     | 0.520       | 0.481      | 0.574       | -0.534      | -0.560 | 0.560  | 0.421    | 0.132     | -0.570     | 0.625    | -0.112 | -0.158 | 0.285  | 0.538  | 0.437  | -0.406 |        |
| Venlafaxine     | -0.240 | -0.192      | -0.033 | -0.283  | -0.303 | 0.229           | 0.408        | 0.377      | 0.508        | 0.003  | 0.096   | -0.367 | 0.204  | 0.355   | -0.265 | 0.410        | -0.504   | -0.411   | 0.483     | 0.543  | -0.508     | 0.469       | 0.071      | 0.448       | -0.346      | -0.263 | 0.421  | 0.181    | -0.100    | -0.291     | 0.429    | 0.109  | -0.273 | 0.457  | 0.395  | 0.251  | -0.212 |        |
| Citalopram      | -0.352 | -0.415      | 0.136  | -0.289  | -0.144 | -0.268          | 0.379        | 0.044      | 0.308        | 0.238  | 0.122   | -0.366 | 0.094  | 0.496   | -0.180 | 0.210        | -0.375   | -0.374   | 0.393     | 0.361  | -0.293     | 0.479       | -0.007     | 0.305       | -0.185      | -0.270 | 0.265  | 0.047    | -0.066    | -0.269     | 0.120    | 0.348  | -0.226 | 0.505  | 0.135  | -0.097 | -0.031 |        |
| Mirtazapine     | -0.140 | -0.208      | 0.053  | -0.201  | -0.130 | 0.260           | 0.354        | 0.352      | 0.550        | 0.089  | 0.067   | -0.357 | 0.310  | 0.298   | -0.372 | 0.456        | -0.520   | -0.333   | 0.372     | 0.527  | -0.576     | 0.453       | 0.014      | 0.372       | -0.184      | -0.178 | 0.380  | 0.033    | 0.225     | -0.224     | 0.543    | -0.002 | -0.301 | 0.433  | 0.367  | 0.178  | -0.055 |        |
| Amtripyline     | -0.140 | -0.555      | 0.073  | -0.674  | -0.449 | -0.054          | 0.719        | 0.545      | 0.593        | 0.287  | -0.116  | -0.212 | -0.266 | 0.389   | -0.156 | 0.075        | -0.672   | -0.661   | 0.445     | 0.593  | -0.565     | 0.659       | 0.326      | 0.688       | -0.564      | -0.616 | 0.645  | 0.555    | -0.171    | -0.683     | 0.427    | 0.329  | 0.248  | 0.567  | 0.520  | 0.385  | -0.461 |        |
| Carbamazepine   | -0.154 | -0.231      | 0.112  | -0.304  | -0.191 | 0.051           | 0.378        | 0.247      | 0.370        | 0.072  | 0.013   | -0.291 | 0.021  | 0.272   | -0.160 | 0.218        | -0.422   | -0.337   | 0.323     | 0.306  | -0.337     | 0.418       | 0.011      | 0.326       | -0.197      | -0.270 | 0.261  | 0.170    | -0.015    | -0.262     | 0.264    | 0.126  | 0.218  | 0.356  | 0.218  | 0.181  | -0.158 |        |
| gabapentin      | -0.130 | -0.113      | -0.279 | 0.225   | 0.341  | 0.128           | -0.111       | -0.176     | -0.031       | 0.264  | 0.326   | -0.377 | 0.188  | 0.169   | -0.129 | 0.277        | 0.021    | 0.176    | 0.090     | -0.014 | -0.086     | 0.035       | 0.388      | -0.131      | 0.372       | 0.228  | -0.159 | -0.363   | 0.185     | 0.232      | -0.054   | 0.122  | -0.113 | 0.242  | -0.225 | -0.385 | 0.307  |        |
| Pregabalin      | -0.239 | -0.396      | 0.225  | -0.488  | -0.236 | 0.088           | 0.624        | 0.554      | 0.745        | 0.077  | 0.008   | -0.411 | 0.139  | 0.419   | -0.396 | 0.398        | -0.748   | -0.557   | 0.513     | 0.688  | -0.767     | 0.669       | 0.203      | 0.641       | -0.392      | -0.488 | 0.662  | 0.260    | 0.147     | -0.511     | 0.656    | 0.148  | 0.483  | 0.617  | 0.615  | 0.331  | -0.198 |        |
| Amphetamine     | 0.146  | -0.161      | 0.296  | -0.318  | -0.275 | 0.187           | 0.333        | 0.525      | 0.246        | 0.054  | -0.357  | 0.063  | -0.002 | -0.073  | -0.046 | -0.008       | -0.310   | -0.261   | 0.202     | 0.179  | -0.309     | 0.292       | 0.342      | -0.358      | -0.465      | 0.469  | 0.457  | -0.170   | -0.436    | 0.427      | -0.399   | -0.108 | -0.137 | 0.407  | 0.495  | -0.448 |        |        |
| Methamphetamine | -0.061 | -0.121      | 0.171  | -0.301  | -0.330 | 0.272           | 0.346        | 0.509      | 0.246        | 0.177  | -0.158  | -0.159 | 0.117  | 0.107   | -0.150 | 0.212        | -0.360   | -0.259   | 0.338     | 0.253  | -0.278     | 0.399       | 0.498      | 0.463       | -0.377      | -0.462 | 0.518  | 0.437    | -0.302    | -0.459     | 0.400    | -0.351 | -0.225 | -0.084 | 0.479  | 0.545  | -0.502 |        |
| Ethyl sulfate   | 0.131  | 0.385       | -0.365 | 0.487   | 0.365  | 0.058           | -0.476       | -0.410     | -0.423       | 0.243  | 0.361   | -0.150 | 0.243  | -0.049  | -0.052 | 0.085        | 0.420    | 0.499    | -0.192    | -0.439 | 0.390      | -0.471      | -0.450     | 0.523       | 0.460       | -0.483 | -0.475 | 0.091    | 0.501     | -0.413     | -0.072   | -0.068 | -0.223 | -0.477 | -0.450 | 0.358  |        |        |
| Hydroxyacetone  | -0.257 | -0.280      | 0.297  | -0.320  | -0.205 | 0.074           | 0.355        | 0.346      | 0.331        | -0.048 | 0.091   | -0.368 | 0.170  | 0.267   | -0.308 | 0.271        | -0.371   | -0.261   | 0.458     | 0.216  | -0.278     | 0.512       | 0.314      | 0.389       | -0.254      | -0.434 | 0.411  | 0.234    | 0.060     | -0.434     | 0.376    | -0.245 | 0.384  | 0.097  | 0.366  | 0.239  | -0.375 |        |
| Cotinine        | -0.231 | -0.377      | 0.405  | -0.354  | -0.220 | -0.152          | 0.378        | 0.361      | 0.255        | -0.145 | 0.035   | -0.301 | 0.104  | 0.250   | -0.311 | 0.219        | -0.383   | -0.295   | 0.438     | 0.208  | -0.261     | 0.527       | 0.374      | 0.399       | -0.291      | -0.468 | 0.428  | 0.287    | 0.132     | -0.470     | 0.389    | -0.265 | 0.371  | 0.073  | 0.397  | 0.336  | -0.409 |        |
| Nicotine        | -0.340 | -0.126      | 0.198  | -0.180  | -0.102 | 0.032           | 0.248        | 0.265      | 0.206        | 0.023  | 0.109   | -0.399 | 0.187  | 0.251   | -0.288 | 0.296        | -0.326   | -0.183   | 0.322     | 0.165  | -0.183     | 0.448       | 0.255      | 0.326       | -0.189      | -0.336 | 0.342  | 0.177    | 0.091     | -0.333     | 0.265    | -0.279 | -0.435 | 0.027  | 0.268  | 0.198  | -0.311 |        |
| Ibuprofen       | 0.096  | 0.156       | -0.126 | 0.322   | 0.397  | 0.030           | -0.345       | -0.278     | -0.361       | 0.261  | 0.144   | -0.047 | 0.165  | -0.140  | 0.036  | 0.011        | 0.305    | 0.423    | -0.219    | -0.411 | 0.249      | -0.248      | -0.314     | -0.330      | 0.448       | 0.253  | -0.338 | -0.298   | 0.157     | 0.283      | -0.158   | -0.263 | 0.004  | -0.238 | -0.369 | -0.289 | 0.247  |        |
| Naproxen        | -0.187 | -0.085      | 0.046  | 0.150   | 0.306  | -0.160          | -0.118       | -0.182     | -0.035       | 0.040  | 0.246   | -0.287 | 0.197  | 0.149   | -0.269 | 0.020        | 0.001    | 0.166    | 0.024     |        |            |             |            |             |             |        |        |          |           |            |          |        |        |        |        |        |        |        |

**Table S2.** LC-MS/MS parameters of chemicals measured using method B.

| Chemical            | RT   | Parent | DP   | Quantifier | CE  | CXP | Qualifier | CE  | CXP | IS                  | Polarity |
|---------------------|------|--------|------|------------|-----|-----|-----------|-----|-----|---------------------|----------|
| 2PY                 | 1.34 | 143.1  | 95   | 108        | 29  | 17  | 110       | 28  | 12  | Pregabalin D4       | Positive |
| 4PY                 | 2.22 | 153.1  | 40   | 136        | 18  | 16  | 92        | 29  | 11  | Pregabalin D4       | Positive |
| 4-pyridoxic acid    | 1.42 | 182.1  | -25  | 138        | -19 | -17 | 108       | -28 | -9  | Acesulfame D4       | Negative |
| αCEHC               | 7.14 | 277    | -96  | 233        | -21 | -13 | 163       | -30 | -15 | Sucralose D6        | Negative |
| Enterodiol          | 6.37 | 301    | -100 | 253        | -32 | -13 | 271       | -32 | -17 | Ibuprofen D3        | Negative |
| Enterolactone       | 6.91 | 297    | -100 | 253        | -28 | -16 | 189       | -30 | -14 | Ibuprofen D3        | Negative |
| Proline betaine     | 0.74 | 144.1  | 80   | 58         | 33  | 16  | 84        | 30  | 9   | Hydroxycotinine D3  | Positive |
| Paraxanthine        | 4.97 | 502.1  | 22   | 484.1      | 32  | 28  | 466.1     | 38  | 24  | Caffeine 13C3       | Positive |
| Caffeine            | 5.73 | 389.1  | 45   | 201.1      | 25  | 11  | 165.1     | 85  | 17  | Caffeine 13C3       | Positive |
| Noroxycodone        | 4.96 | 305.1  | 70   | 287.1      | 22  | 16  | 230.1     | 38  | 12  | Codeine D3          | Positive |
| Tramadol            | 5.81 | 264.2  | 40   | 58         | 42  | 8   | 42        | 123 | 5   | Caffeine 13C3       | Positive |
| Desvenlafaxine      | 5.39 | 264.1  | 40   | 107.1      | 46  | 12  | 133.1     | 33  | 15  | Caffeine 13C3       | Positive |
| Venlafaxine         | 6.23 | 278.2  | 40   | 58         | 48  | 9   | 121       | 38  | 14  | Venlafaxine D6      | Positive |
| Citalopram          | 6.55 | 325.3  | 70   | 109        | 36  | 14  | 262.2     | 26  | 24  | Citalopram D6       | Positive |
| Mirtazapine         | 6.36 | 266    | 70   | 195        | 34  | 24  | 72        | 24  | 10  | Citalopram D6       | Positive |
| Amitriptyline       | 7.08 | 278.1  | 65   | 191.1      | 32  | 10  | 117       | 29  | 14  | Cetirizine D4       | Positive |
| Carbamazepine       | 7.09 | 237.2  | 86   | 194        | 29  | 14  | 193       | 45  | 12  | Carbamazepine D10   | Positive |
| Gabapentin          | 4.44 | 172.1  | 45   | 154        | 19  | 14  | 137       | 23  | 14  | Gabapentin D10      | Positive |
| Pregabalin          | 3.21 | 160.2  | 38   | 142.1      | 15  | 15  | 55        | 30  | 14  | Pregabalin D4       | Positive |
| Hydroxycotinine     | 2.16 | 141    | 44   | 95         | 20  | 12  | 68        | 36  | 16  | Hydroxycotinine D3  | Positive |
| Cotinine            | 4.5  | 315.1  | 47   | 176.1      | 23  | 20  | 130.1     | 31  | 16  | Cotinine D3         | Positive |
| Ibuprofen           | 7.48 | 205.1  | -32  | 161        | -10 | -15 | 159       | -9  | -15 | Ibuprofen D3        | Negative |
| Naproxen            | 7.34 | 136.1  | 53   | 60         | 29  | 19  | 77.1      | 17  | 12  | Cetirizine D4       | Positive |
| Fexofenadine        | 7.14 | 502.1  | 22   | 484.1      | 32  | 28  | 466       | 38  | 24  | Fexofenadine D6     | Positive |
| Cetirizine          | 7.34 | 389.1  | 45   | 201.1      | 25  | 11  | 165.1     | 85  | 17  | Cetirizine D4       | Positive |
| Cephalexin          | 5.5  | 348.3  | 24   | 158.1      | 20  | 11  | 174.1     | 25  | 13  | Sulfamethoxazole D4 | Positive |
| Sulfamethoxazole    | 5.84 | 254.2  | 100  | 156        | 37  | 12  | 92        | 20  | 15  | Sulfamethoxazole D4 | Positive |
| Trimethoprim        | 5.25 | 292.4  | 90   | 231.2      | 30  | 15  | 262.1     | 25  | 12  | Codeine D3          | Positive |
| Fluconazole         | 5.95 | 307.3  | 48   | 220.1      | 22  | 21  | 238.1     | 21  | 15  | SMTZ D4             | Positive |
| Acesulfame          | 1.19 | 162    | -25  | 82         | -18 | -9  | 78        | -43 | -9  | Acesulfame D4       | Negative |
| Saccharin           | 3.27 | 182    | -125 | 42         | -59 | -19 | 106       | -25 | -12 | Saccharin D4        | Negative |
| Sucralose           | 4.78 | 394.8  | -32  | 35         | -64 | -15 | 359       | -15 | -13 | Sucralose D6        | Negative |
| Hydroxycotinine D3  | 2.11 | 196.1  | 84   | 80         | 35  | 13  | 134.1     | 26  | 20  | -                   | Positive |
| Pregabalin D4       | 3.12 | 164.2  | 56   | 146.2      | 15  | 16  | 85.1      | 21  | 10  | -                   | Positive |
| Gabapentin D10      | 4.38 | 182    | 45   | 164        | 19  | 14  | 147       | 23  | 14  | -                   | Positive |
| Cotinine D3         | 4.48 | 180.1  | 100  | 80         | 34  | 10  | 101       | 30  | 10  | -                   | Positive |
| Codeine D3          | 5.08 | 303.3  | 96   | 152        | 89  | 15  | 115       | 103 | 14  | -                   | Positive |
| Caffeine 13C3       | 5.73 | 198.3  | 60   | 140.1      | 24  | 17  | 112.1     | 33  | 14  | -                   | Positive |
| Sulfamethoxazole D4 | 5.83 | 258.2  | 100  | 160        | 35  | 12  | 96        | 30  | 15  | -                   | Positive |
| Venlafaxine D6      | 6.21 | 284.2  | 40   | 64         | 48  | 9   | 121       | 38  | 14  | -                   | Positive |
| Citalopram D6       | 6.54 | 331.2  | 80   | 262.1      | 28  | 15  | 247.1     | 42  | 13  | -                   | Positive |
| Carbamazepine D10   | 7.06 | 247.2  | 65   | 204.2      | 28  | 18  | 202.1     | 49  | 17  | -                   | Positive |
| Fexofenadine D6     | 7.13 | 508.2  | 140  | 472.2      | 38  | 15  | 490.2     | 31  | 15  | -                   | Positive |
| Cetirizine D4       | 7.33 | 393.1  | 51   | 201.1      | 25  | 11  | 165.1     | 82  | 18  | -                   | Positive |
| Ibuprofen D3        | 7.48 | 208.1  | -30  | 164        | -10 | -15 | 161       | -9  | -13 | -                   | Negative |
| Acesulfame D4       | 1.16 | 166    | -25  | 86         | -20 | -9  | 78        | -43 | -9  | -                   | Negative |
| Saccharin D4        | 3.15 | 186    | -75  | 42         | -60 | -18 | 106       | -27 | -10 | -                   | Negative |
| Sucralose D6        | 4.77 | 400.8  | -120 | 35         | -58 | -15 | 265       | -16 | -12 | -                   | Negative |

RT: retention time (mins), DP: declustering potential (V), CE: collision energy (V), CXP: collision exit potential (V), IS: internal standard.

**Table S3.** Validation of method B for limit of detection (LOD), limit of quantitation (LOQ), linearity, range and relative matrix effect (RME).

|                  | LOD (ppb) | LOQ (ppb) | Linearity (R <sup>2</sup> ) | Range (ppb) | RME (%) |
|------------------|-----------|-----------|-----------------------------|-------------|---------|
| 2PY              | 0.01      | 0.04      | 0.9968                      | 0.05-50     | -22.5   |
| 4PY              | 0.02      | 0.05      | 0.9967                      | 0.05-50     | -13.3   |
| αCEHC            | 0.21      | 0.68      | 0.9995                      | 0.5-50      | -10.3   |
| 4-Pyridoxic acid | 0.02      | 0.06      | 0.9970                      | 0.2-150     | 8.3     |
| Enterodiol       | 0.01      | 0.04      | 0.9985                      | 0.05-50     | 0.5     |
| Enterolactone    | 0.01      | 0.03      | 0.9984                      | 0.05-50     | -0.5    |
| Proline betaine  | 0.03      | 0.09      | 0.9973                      | 0.2-150     | -18.6   |
| Paraxanthine     | 0.02      | 0.07      | 0.9999                      | 0.05-150    | -20.1   |
| Caffeine         | 0.01      | 0.03      | 0.9997                      | 0.05-150    | -40.9   |
| Noroxycodone     | 0.01      | 0.03      | 0.9987                      | 0.05-50     | -6.9    |
| Tramadol         | 0.02      | 0.06      | 0.9995                      | 0.05-50     | -16.5   |
| Desvenlafaxine   | 0.03      | 0.09      | 0.9985                      | 0.05-50     | -17.1   |
| Venlafaxine      | 0.03      | 0.10      | 0.9999                      | 0.05-50     | -10.3   |
| Citalopram       | 0.02      | 0.05      | 0.9960                      | 0.05-50     | -10.7   |
| Mirtazapine      | 0.02      | 0.07      | 0.9997                      | 0.05-50     | -15.8   |
| Amitriptyline    | 0.03      | 0.09      | 0.9953                      | 0.05-50     | -12.3   |
| Carbamazepine    | 0.01      | 0.04      | 0.9999                      | 0.05-50     | -10.2   |
| Gabapentin       | 0.01      | 0.03      | 0.9992                      | 0.05-50     | -16.5   |
| Pregabalin       | 0.27      | 0.82      | 0.9998                      | 2-150       | -14.8   |
| Hydroxycotinine  | 0.01      | 0.04      | 0.9988                      | 0.05-50     | 37.6    |
| Cotinine         | 0.01      | 0.30      | 0.9996                      | 0.05-50     | -13.1   |
| Ibuprofen        | 0.04      | 0.13      | 0.9997                      | 0.2-50      | 0.3     |
| Naproxen         | 0.02      | 0.08      | 0.9993                      | 0.05-50     | -10.6   |
| Fexofenadine     | 0.04      | 0.12      | 0.9983                      | 0.05-50     | -11.9   |
| Cetirizine       | 0.01      | 0.04      | 0.9991                      | 0.05-50     | -22.5   |
| Cephalexin       | 0.03      | 0.10      | 0.9995                      | 0.05-50     | -9.8    |
| Sulfamethoxazole | 0.02      | 0.07      | 0.9997                      | 0.05-50     | -10.9   |
| Trimethoprim     | 0.02      | 0.07      | 0.9990                      | 0.05-50     | -7.4    |
| Fluconazole      | 0.01      | 0.03      | 0.9988                      | 0.05-50     | -4.4    |
| Acesulfame       | 0.01      | 0.04      | 1.0000                      | 0.05-150    | -3.8    |
| Saccharin        | 0.04      | 0.13      | 0.9999                      | 0.05-150    | -1.5    |
| Sucralose        | 0.02      | 0.07      | 0.9973                      | 0.2-150     | -2.7    |

LOD and LOQ were calculated as 3.3 and 10 times (respectively) of the standard deviation of seven repeat injections of the lowest detectable standard. RME was calculated as the ratio of the slope of calibration curves made in pooled wastewater (pH2) and MilliQ water (pH2) when no internal standard is used. Positive RME indicates matrix enhancement, and negative RME indicates matrix suppression. 2PY: N-methyl-2-pyridone-5-carboxamide, 4PY: N-methyl-4-pyridone-3-carboxamide, αCEHC: α-carboxyethyl hydrochroman.



**Table S4.** Validation of method B for instrumental precision and accuracy in pH2 MillQ water.

|                  | Precision (% RSD) |        |         |          |        |         | Accuracy (%) |        |         |          |        |         |
|------------------|-------------------|--------|---------|----------|--------|---------|--------------|--------|---------|----------|--------|---------|
|                  | Intraday          |        |         | Interday |        |         | Intraday     |        |         | Interday |        |         |
|                  | 0.2 µg/L          | 2 µg/L | 20 µg/L | 0.2 µg/L | 2 µg/L | 20 µg/L | 0.2 µg/L     | 2 µg/L | 20 µg/L | 0.2 µg/L | 2 µg/L | 20 µg/L |
| 2PY              | 2.0               | 0.4    | 0.7     | 1.7      | 0.9    | 0.7     | 3.6          | -4.0   | -3.6    | 6.8      | -1.3   | 0.3     |
| 4PY              | 3.0               | 1.0    | 0.7     | 4.3      | 0.9    | 1.1     | -4.1         | -4.1   | -0.7    | -5.3     | -3.7   | -0.1    |
| αCEHC            | 1.5               | 0.8    | 0.9     | 2.4      | 1.2    | 1.1     | -5.9         | -6.6   | -5.2    | -5.8     | -3.1   | 2.0     |
| 4-Pyridoxic acid | 2.7               | 1.0    | 0.5     | 2.0      | 1.0    | 0.4     | -1.5         | -6.3   | -2.6    | -2.9     | -3.1   | -0.5    |
| Enterodiol       | 2.8               | 1.6    | 1.1     | 3.4      | 1.2    | 1.1     | 6.3          | 0.5    | 2.9     | 5.9      | -1.4   | 1.7     |
| Enterolactone    | 0.7               | 1.5    | 1.2     | 1.6      | 0.7    | 1.4     | 3.4          | 0.1    | -6.7    | 5.5      | 3.0    | -3.7    |
| Proline betaine  | 2.1               | 1.7    | 0.7     | 4.1      | 0.5    | 1.0     | 0.3          | 3.3    | -3.4    | 1.2      | 3.3    | -2.0    |
| Paraxanthine     | 2.0               | 1.6    | 0.7     | 1.7      | 0.9    | 1.5     | -5.9         | -4.6   | -0.8    | -5.4     | -3.7   | -0.1    |
| Caffeine         | 2.1               | 1.3    | 0.9     | 1.9      | 0.8    | 0.9     | -8.9         | -8.8   | -4.7    | -7.2     | -7.8   | -2.6    |
| Noroxycodone     | 3.4               | 0.7    | 1.1     | 4.5      | 1.1    | 1.1     | -8.4         | -9.0   | -5.0    | -5.7     | -7.0   | -0.5    |
| Tramadol         | 5.2               | 2.9    | 3.6     | 4.6      | 3.1    | -2.3    | -8.6         | -9.7   | -1.7    | -6.3     | -8.9   | -2.1    |
| Desvenlafaxine   | 2.0               | 1.8    | 3.0     | 3.9      | 2.2    | 2.1     | -4.0         | 0.8    | 2.2     | -1.2     | -0.5   | 0.6     |
| Venlafaxine      | 3.8               | 1.9    | 1.7     | 3.6      | 1.3    | 3.3     | -0.2         | 0.5    | 2.2     | -0.4     | -2.9   | -2.8    |
| Citalopram       | ND                | 4.5    | 1.4     | ND       | 2.6    | 2.5     | ND           | -7.7   | 1.6     | ND       | -3.9   | 0.5     |
| Mirtazapine      | 5.8               | 1.6    | 0.8     | 4.6      | 1.2    | 0.8     | -1.8         | -3.6   | 1.1     | 2.4      | -2.3   | 0.4     |
| Amitriptyline    | 4.4               | 2.1    | 1.4     | 3.6      | 2.4    | 1.6     | -5.3         | -6.4   | 0.2     | -6.0     | -7.2   | -3.0    |
| Carbamazepine    | 3.7               | 1.3    | 2.5     | 3.9      | 2.3    | 1.3     | -6.5         | -5.1   | 2.9     | -7.6     | -7.4   | 1.7     |
| Gabapentin       | 2.5               | 1.4    | 0.9     | 4.2      | 0.9    | 0.7     | -4.1         | -7.7   | -0.4    | -5.4     | -7.2   | -2.1    |
| Pregabalin       | 5.4               | 4.3    | 1.2     | 5.7      | 4.1    | 2.0     | -3.3         | -0.5   | 4.4     | -0.5     | -0.4   | 0.9     |
| Hydroxycotinine  | 3.5               | 1.4    | 1.0     | 1.2      | 2.9    | 1.6     | -2.7         | -3.9   | 1.7     | -6.2     | -5.8   | -2.9    |
| Cotinine         | 3.5               | 1.5    | 0.6     | 2.1      | 1.4    | 0.9     | -3.3         | -1.9   | 0.9     | -3.8     | -2.8   | 0.3     |
| Ibuprofen        | 1.6               | 2.5    | 1.0     | 1.7      | 1.8    | 2.1     | -4.4         | -0.4   | 5.5     | 2.2      | -1.9   | 0.6     |
| Naproxen         | 1.7               | 1.1    | 0.7     | 1.4      | 1.2    | 0.8     | -2.2         | -2.6   | -0.2    | -3.3     | -2.1   | -0.3    |
| Fexofenadine     | 1.8               | 0.9    | 0.5     | 3.2      | 0.9    | 0.6     | -3.3         | -0.9   | 1.2     | -0.5     | -0.9   | 1.1     |
| Cetirizine       | 3.6               | 2.8    | 1.0     | 7.9      | -2.8   | 1.2     | 1.4          | -0.9   | 3.1     | 6.4      | -1.9   | 1.0     |
| Cephalexin       | 2.0               | 1.4    | 1.8     | 3.2      | -1.5   | -1.7    | 5.8          | 8.9    | 6.1     | 7.5      | 5.1    | 8.5     |
| Sulfamethoxazole | 2.5               | 2.2    | 1.6     | 2.4      | 1.8    | 1.9     | 6.8          | 9.7    | 5.3     | 6.8      | 7.4    | 3.3     |
| Trimethoprim     | ND                | 4.6    | 1.2     | ND       | 3.1    | 2.4     | ND           | 6.2    | 2.3     | ND       | 5.7    | 4.5     |
| Fluconazole      | 3.2               | 1.8    | 0.7     | 7.5      | -1.0   | 0.7     | -4.3         | -2.1   | 4.7     | 0.0      | 5.7    | -0.5    |
| Acesulfame       | 4.7               | 1.3    | 0.5     | 3.5      | 1.4    | 1.2     | -4.1         | -12.3  | -7.5    | -0.7     | -5.1   | 1.8     |
| Saccharin        | 2.1               | 0.7    | 0.9     | 4.2      | 2.0    | 1.4     | 5.0          | 7.6    | 2.0     | 6.4      | 6.7    | 4.9     |
| Sucralose        | 1.5               | 0.7    | 1.2     | 0.0      | 1.6    | 1.0     | 6.4          | 3.8    | 3.1     | 6.7      | 5.6    | 4.3     |

Precision was calculated as the standard deviation divided by the average of seven repeat injections at 0.2, 2 and 20 µg/L. Accuracy was determined using the deviation of a measured value from its spiked value, using seven repeat injections at 0.2, 2 and 20 µg/L. Interday samples were analyzed on a different batch a week after intraday samples. ND: not detected. 2PY: N-methyl-2-pyridone-5-carboxamide, 4PY: N-methyl-4-pyridone-3-carboxamide, αCEHC: α-carboxyethyl hydrochroman.

**Table S5.** Validation of method B for instrumental precision and accuracy in pH2 pooled wastewater.

|                  | Precision (% RSD) |        |         |          |        |         | Accuracy (%) |        |         |          |        |         |
|------------------|-------------------|--------|---------|----------|--------|---------|--------------|--------|---------|----------|--------|---------|
|                  | Intraday          |        |         | Interday |        |         | Intraday     |        |         | Interday |        |         |
|                  | 0.2 µg/L          | 2 µg/L | 20 µg/L | 0.2 µg/L | 2 µg/L | 20 µg/L | 0.2 µg/L     | 2 µg/L | 20 µg/L | 0.2 µg/L | 2 µg/L | 20 µg/L |
| Hydroxycotinine  | 3.6               | 2.8    | 3.4     | 4.1      | 3.4    | 1.4     | 3.8          | 7.1    | 3.4     | 4.7      | 5.3    | -2.2    |
| Cotinine         | 2.3               | 1.9    | 2.7     | 4.6      | 2.4    | 1.2     | 5.5          | 4.1    | 2.7     | 5.2      | 7.1    | 2.4     |
| Paraxanthine     | ND                | 3.3    | 1.1     | ND       | 2.7    | 2.4     | ND           | 3.1    | 1.1     | ND       | 7.0    | 0.1     |
| Caffeine         | 4.2               | 1.4    | 1.3     | 3.1      | 3.1    | 1.0     | 3.8          | 2.6    | 1.3     | 2.5      | 2.6    | 0.3     |
| Noroxycodone     | 3.6               | 1.2    | 1.0     | 1.8      | 1.4    | 0.6     | 7.2          | 5.9    | 1.0     | 7.1      | 0.2    | -3.2    |
| Tramadol         | 6.9               | 2.4    | 2.0     | 4.1      | 0.8    | 1.9     | 6.2          | 4.4    | 2.0     | 5.8      | 7.4    | 4.2     |
| Desvenlafaxine   | 7.3               | 3.6    | 1.7     | 8.3      | 3.7    | 0.6     | 3.0          | 5.3    | 1.7     | 7.0      | 0.2    | -2.5    |
| Venlafaxine      | 2.4               | 2.8    | 1.5     | 6.6      | 3.3    | 1.6     | 7.4          | 7.6    | 1.5     | 7.0      | 4.3    | 2.0     |
| Citalopram       | 5.7               | 6.8    | 1.2     | 5.8      | 2.8    | 0.8     | 5.8          | 6.2    | 1.2     | 8.9      | 4.2    | -0.3    |
| Mirtazapine      | 2.6               | 1.4    | 1.8     | 2.1      | 0.9    | 3.1     | -1.5         | 5.6    | 1.8     | -1.8     | 5.8    | 9.0     |
| Amitriptyline    | 2.3               | 0.7    | 1.0     | 4.6      | 2.4    | 1.7     | 5.5          | 9.6    | 1.0     | 6.9      | 5.7    | -0.9    |
| Carbamazepine    | 3.6               | 1.4    | 1.1     | 3.5      | 1.3    | 0.5     | 4.5          | 3.9    | 1.1     | 9.0      | 8.8    | 3.1     |
| Gabapentin       | 3.1               | 1.3    | 1.0     | 3.1      | 1.2    | 1.5     | 0.6          | 1.3    | 1.0     | 3.9      | 0.1    | 0.8     |
| Pregabalin       | 0.6               | 1.0    | 1.0     | 2.2      | 0.7    | 0.5     | -0.2         | -8.8   | 1.0     | -0.7     | -4.0   | 1.7     |
| Ibuprofen        | 3.2               | 1.2    | 1.3     | 2.5      | 0.6    | 1.1     | -4.9         | -3.6   | 1.3     | -3.6     | -5.5   | -1.0    |
| Naproxen         | 5.1               | 3.4    | 1.8     | 5.9      | 3.2    | 2.3     | -5.2         | -8.4   | 1.8     | -0.5     | -2.0   | 5.2     |
| Fexofenadine     | 3.6               | 2.8    | 1.9     | 4.2      | 1.9    | 3.8     | 0.8          | 4.2    | 1.9     | -3.8     | 3.2    | 0.9     |
| Cetirizine       | 7.4               | 2.0    | 1.5     | 3.2      | 1.6    | 1.7     | 4.1          | 11.1   | 1.5     | 6.5      | 6.7    | 0.2     |
| Cephalexin       | 9.2               | 3.7    | 2.5     | 6.5      | 3.1    | 1.1     | 2.7          | 1.3    | 2.5     | 7.7      | 0.9    | 0.0     |
| Sulfamethoxazole | 2.7               | 1.8    | 0.8     | 3.2      | 1.4    | 0.5     | 0.3          | -10.6  | 0.8     | -0.5     | 4.1    | -0.6    |
| Trimethoprim     | 1.9               | 1.2    | 0.8     | 2.8      | 1.7    | 1.1     | 8.9          | 3.1    | 0.8     | 6.6      | 2.5    | -0.7    |
| Fluconazole      | 6.7               | 2.6    | 1.3     | 3.2      | 2.8    | 1.0     | -1.0         | 2.8    | 1.3     | 7.2      | 2.2    | 0.4     |
| Acesulfame       | 10.8              | 2.7    | 2.1     | 5.8      | 1.2    | 1.7     | 3.9          | 5.5    | 2.1     | 7.7      | -1.8   | -3.4    |
| Saccharin        | 9.2               | 1.7    | 1.5     | 6.1      | 3.9    | 2.2     | -1.1         | -7.3   | 1.5     | 2.3      | -7.4   | 1.4     |
| Sucralose        | 2.0               | 0.9    | 1.6     | 2.0      | 1.3    | 0.7     | -8.7         | -9.3   | 1.6     | -4.3     | -8.5   | 2.3     |
| 2PY              | 5.3               | 4.9    | 1.5     | 5.1      | 3.2    | 3.0     | -2.6         | -1.2   | 1.5     | -0.3     | -2.1   | 3.2     |
| 4PY              | 6.5               | 1.3    | 0.6     | 4.2      | 0.9    | 1.1     | 1.4          | -1.4   | 0.6     | 5.8      | 0.2    | -0.5    |
| αCEHC            | 3.6               | 2.2    | 1.1     | 2.8      | 1.2    | 1.4     | 2.0          | 13.7   | 1.1     | -1.4     | 6.3    | -3.2    |
| 4-Pyridoxic acid | 2.2               | 3.9    | 1.9     | 3.5      | 1.5    | 2.1     | -1.7         | -5.0   | 1.9     | 1.2      | -2.6   | 0.6     |
| Proline betaine  | 1.9               | 3.0    | 0.9     | 4.5      | 0.8    | 0.8     | 5.3          | 4.8    | 0.9     | 8.6      | 3.7    | 1.6     |
| Enterodiol       | 4.2               | 1.2    | 0.5     | 3.4      | 0.8    | 0.5     | 3.1          | 5.5    | 0.5     | 5.9      | 3.7    | 0.8     |
| Enterolactone    | 3.1               | 1.7    | 1.6     | 4.6      | 3.8    | 1.5     | 7.1          | 6.5    | 1.6     | -1.4     | 2.9    | 0.7     |

Precision was calculated as the standard deviation divided by the average of seven repeat injections at 0.2, 2 and 20 µg/L. Accuracy was determined using the deviation of a measured value from its spiked value, using seven repeat injections at 0.2, 2 and 20 µg/L. Interday samples were analyzed on a different batch a week after intraday samples. ND: not detected. 2PY: N-methyl-2-pyridone-5-carboxamide, 4PY: N-methyl-4-pyridone-3-carboxamide, αCEHC: α-carboxyethyl hydrochroman.

## References

1. Statistics MA (2019) Requested PBS & RPBS Items processed from January 2016 to December 2016. in *Pharmaceuticals Benefits Schedule Item Reports* (Australian Government Department of Human Services).
2. O'Brien JW, *et al.* (2017) National Wastewater Drug Monitoring Program - Report 1. (The University of Queensland & University of South Australia, Australian Criminal Intelligence Commission (ACIC)), p 64.
3. AIHW (2017) National Drug Strategy Household Survey 2016: detailed findings. in *Drug Statistics* (Australian Institute of Health and Welfare, Canberra), p 168.
4. Tscharke B, *et al.* (2017) National Wastewater Drug Monitoring Program (NWMDP) Report 3. (University of Queensland; University of South Australia), p 60.
